# Supplementary material for: Postsynaptic plasticity of cholinergic synapses underlies the induction and expression of appetitive and familiarity memories in Drosophila
Source: eLife journal article supplement (doi:10.7554/elife.80445), 2022-10-17
Supplement: supp [file elife-80445-supp-v1.zip]

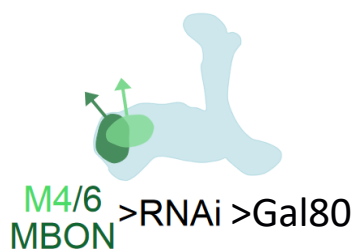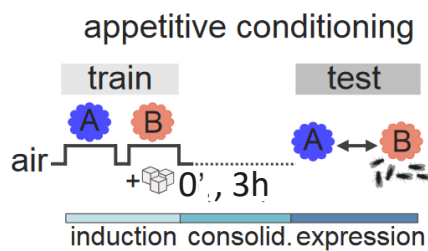

**a** immediate

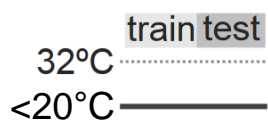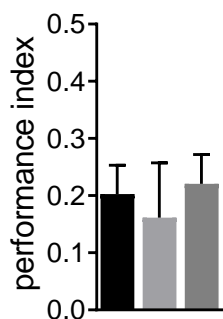

w1118 ● ●  
Gal80 ● ●  
VT1211 ● ●  
α5 RNAi ● ●

**b** mid term

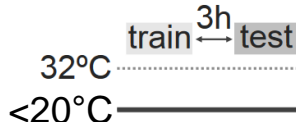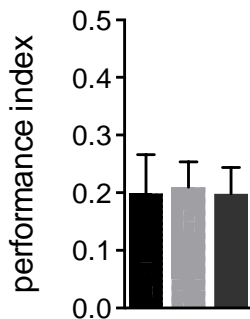

w1118 ● ●  
Gal80 ● ●  
VT1211 ● ●  
α2 RNAi ● ●

**c** mid term

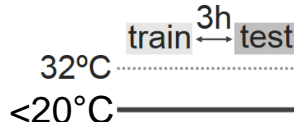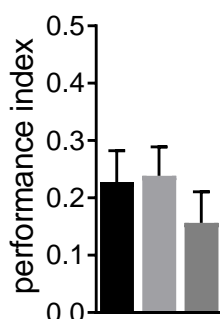

w1118 ● ●  
Gal80 ● ●  
VT1211 ● ●  
α5 RNAi ● ●

**d** mid term

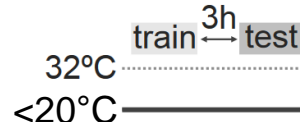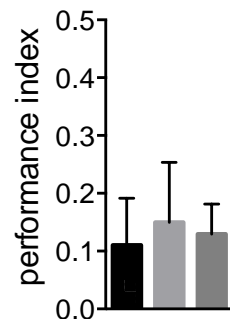

w1118 ● ●  
Gal80 ● ●  
VT1211 ● ●  
Dlg RNAi ● ●

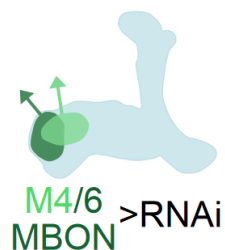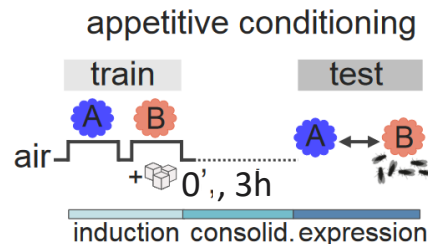

**e** α5

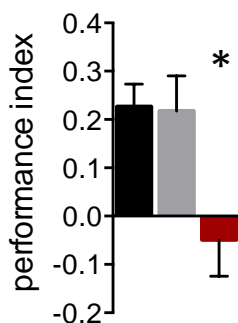

w1118 ● ●  
MB011B ● ●  
α5 RNAi ● ●

**f** α1

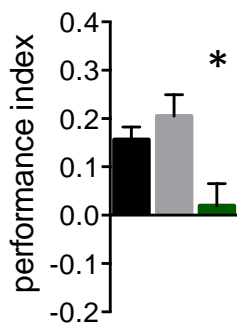

w1118 ● ●  
MB011B ● ●  
α1 RNAi ● ●

**g** α2

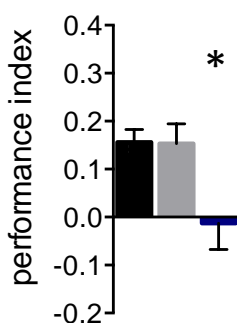

w1118 ● ●  
MB011B ● ●  
α2 RNAi ● ●

**h** α5

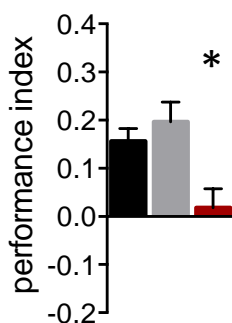

w1118 ● ●  
MB011B ● ●  
α5 RNAi ● ●

**i** Dlg

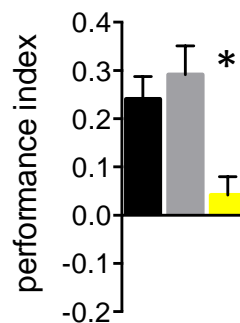

w1118 ● ●  
MB011B ● ●  
Dlg RNAi ● ●
