# Supplementary material for: Postsynaptic plasticity of cholinergic synapses underlies the induction and expression of appetitive and familiarity memories in Drosophila
Source: eLife journal article supplement (doi:10.7554/elife.80445), 2022-10-17
Supplement: supp [file elife-80445-supp-v1.zip]

## Sheet: Tabelle1
control	α2 RNAi	α5 RNAi	dlg RNAi
3.66	13.99	-2.58	-11.1938
0.01	-11.45	-7.34	-11.0865
13.8	-3.75	-40.78	-2.10497
-1.39	-8.01	-24.65	-6.81261
-9.49	9.48	-4.51	-1.70687
-0.32	-3.95	-5.17	5.42082
0.23	-5.3	-20.26	27.504
-5.17	-4.05	-14.26	5.17357
0.66	-8.82	-10.71	-4.43363
1.3		-5.62	-1.9969
8.98		3.33
-5.89		-10.42
1.3		-6.07
-9.01		-11.55
-9.46		-4.44
8.12		-6.5
1.99		-9.47
-2.33		-3.79
3		-2.73
		-7.8
		1.3
		-3.7
		-9.65
		-13.85
		-10.96
		-4.23
		-5.39
		-11.91
