# Supplementary material for: Postsynaptic plasticity of cholinergic synapses underlies the induction and expression of appetitive and familiarity memories in Drosophila
Source: eLife journal article supplement (doi:10.7554/elife.80445), 2022-10-17
Supplement: supp [file source_data_pribbenow Fig 2a.xlsx]

## Sheet: Tabelle1
+	α1	α2	α3	α4	α5	α6	α7	Dlg
0.290451	0.00895857	0.731437	0.407697	0.100699	-0.11	0.0585586	0.324242	0.466667
0.0240385	0.00324675	0.446934	0.320155	0.511905	-0.384314	0.434783	0.391274	0.534503
0.180126	0.112976	0.31738	0.0476281	0.344828	0.0675381	0.270528	-0.345756	0.0698413
0.136482	0.191093	-0.0274123	0.0131219	0.497727	-0.108852	0.0409226	0.0212038	0.106866
0.240592	0.355625	0.593466	0.307017	-0.0392157	0.359524	0.277778	0.157895	0.359245
0.433978	0.345013	0.513393	0.575964	0.257143	-0.232466	0.322059	0.431373	0.274291
0.452685	-0.301489	0.350334	0.211489	0.175284	-0.209302	0.178155	0.266858	0.417044
0.367916	0.144522	-0.55	0.463913	0.504386	0.15873	0.151064	0.366667	0.266888
0.165055	0.107143	0.257774	0.358766		0.0198105
0.443484	-0.0283816	0.44352	0.0264957
0.360269	0.113675	0.390374
0.103529	0.332891	0.37037
-0.00414079	0.359524	0.0750751
0.0746606
0.25672
0.402872
0.232906
0.260546
0.237477
0.3372
