# Supplementary material for: Postsynaptic plasticity of cholinergic synapses underlies the induction and expression of appetitive and familiarity memories in Drosophila
Source: eLife journal article supplement (doi:10.7554/elife.80445), 2022-10-17
Supplement: supp [file Source_data_pribbenow Fig 2b.xlsx]

## Sheet: Tabelle1
+	α1	α2	α3	α4	α5	α6	α7	Dlg
0.16	0.42	-0.01	0.21	0.19	0.05	0.09	-0.06	0.17
0.14	0.49	-0.44	0.01	0.16	-0.13	0.16	0.16	-0.11
0.13	-0.08	0.28	0.06	0.13	-0.17	-0.03	0.18	0.21
0.37	0.17	-0.06	0.36	0.39	0.04	0.03	-0.01	-0.13
0.04	-0.04	-0.01	0.24	0.18	0.19	0.45	0.06	0
0.32	0.07	-0.1	0.09	0.19	0.14	0.21	-0.17	0.06
0.03	0.02	0.18	-0.13	0.16	-0.08	0.25	0.51	0.09
0.25	0.38	0.36	0.21	0.13	0.01	0.09	0.1	0.01
0.1	0.11	-0.23	0.49	0.25	0.42	0.03	0.16	-0.21
-0.17	-0.25	0.43	0.25	0.33	-0.01	0.15	0.06	-0.13
0.11	-0.16	0.3	0.44		-0.42			-0.1
-0.08	0.31	0.3	-0.13		-0.03			0.09
0.13	-0.01	-0.39	0.07		0.12			0.18
0.56	0.32	0.02	0.1		0.13			0.01
0.06	0.01	0.31	0.1		-0.01			0
0.01	-0.08	-0.06	0.06		0.15			0.05
0.03	-0.24	-0.01	-0.28		-0.19
0.27	-0.13	-0.57	0.23		-0.23
0.21	-0.35	-0.25	0		-0.27
0	-0.13	-0.44	-0.3		-0.08
-0.31	-0.16	-0.03	0.2		0.13
0.1	-0.16	0.17	0.26		0.2
0.26	-0.1	-0.27			-0.2
0.38	0.22	-0.01			0.2
0.36		-0.21			0.22
0.36		-0.09			0.45
0.14
0.04
0.47
0.23
0.19
0.1
0.22
0.22
-0.15
0.43
0.21
0.21
