# Supplementary material for: Postsynaptic plasticity of cholinergic synapses underlies the induction and expression of appetitive and familiarity memories in Drosophila
Source: eLife journal article supplement (doi:10.7554/elife.80445), 2022-10-17
Supplement: supp [file Source_data_pribbenow Fig 2c.xlsx]

## Sheet: Tabelle1
+	α1	α2	α3	α4	α5	α6	α7	Dlg
-0.44	-0.68	-0.32	-0.51	-0.57	-0.38	-0.57	-0.62	-0.59
-0.03	-0.28	-0.38	-0.45	-0.55	-0.78	-0.65	-0.54	-0.67
-0.83	-0.58	-0.58	-0.58	-0.56	-0.53	-0.58	-0.61	-0.28
-0.75	-0.49	-0.68	-0.35	-0.46	-0.05	-0.71	-0.65	-0.68
-0.58	-0.73	-0.45	-0.48	-0.67	-0.56	-0.21	-0.52	-0.53
-0.84	-0.76	-0.73	-0.68	-0.02	-0.65	-0.6	-0.71	-0.31
-0.62	-0.58			-0.33		-0.56	-0.28	-0.35
-0.8	-0.36			-0.45		-0.32	-0.52	-0.35
-0.65
-0.71
-0.67
-0.23
