# Supplementary material for: Postsynaptic plasticity of cholinergic synapses underlies the induction and expression of appetitive and familiarity memories in Drosophila
Source: eLife journal article supplement (doi:10.7554/elife.80445), 2022-10-17
Supplement: supp [file Source_data_pribbenow Fig 2d.xlsx]

## Sheet: Tabelle1
+	α1	α2	α3	α4	α5	α6	α7	Dlg
-0.63	-0.54	-0.18	-0.07	-0.38	-0.42	0.05	-0.37	0.14
0.21	0.16	-0.54	-0.51	-0.18	0	-0.46	0.23	-0.39
-0.61	-0.33	-0.33	-0.2	-0.47	-0.61	-0.06	-0.29	-0.32
-0.37	0.04	-0.19	-0.16	-0.31	-0.3	-0.25	0.12	-0.2
-0.28	-0.48	-0.51	-0.34	-0.02	-0.38	-0.03	0.04	-0.09
-0.51	-0.27	0.02	-0.13	-0.09	-0.17	-0.33	-0.39	-0.32
-0.26	-0.08	-0.47	-0.27	-0.41	-0.06	0.34	0.09	-0.25
-0.59	-0.34	0	-0.06	0.31	-0.3	-0.5	0.23	-0.73
-0.33	-0.07	-0.41	-0.28	-0.4	-0.18	0.11	0.19	-0.12
-0.35	-0.49	-0.06	-0.33	-0.13	-0.3	-0.17	-0.11	-0.2
-0.27	-0.33	-0.24	-0.21	-0.2	-0.18	-0.13	-0.31	-0.03
-0.45	-0.35	-0.5	0.22	-0.05	-0.09	0.07	-0.11	-0.56
-0.62	-0.06	0.13	-0.08	-0.12	-0.17	-0.51	-0.01	0
-0.36	-0.2	-0.08	0.1	-0.31	-0.26	-0.45	-0.26	-0.22
-0.38	0.12	-0.21	-0.01	-0.09	-0.45	0.47	0.16	0.21
-0.31	-0.14	-0.09	-0.19	-0.14	-0.27	-0.14	0.03	-0.33
-0.12	-0.01	0.14	-0.05	-0.39	-0.3	-0.12	0.23	0.08
-0.27	-0.15	-0.1	0.33	0	0	0.15	-0.37	-0.14
-0.14	-0.13	-0.14	0.02	-0.33	-0.13	-0.39	0.35	-0.11
-0.17	0.15	-0.05	-0.5	-0.32	-0.23	0.11	0.35	0.14
-0.39	-0.25	-0.2	0.75	-0.28	-0.17	-0.01	0.12	0.08
-0.16	-0.3	-0.45	-0.04	0.2	-0.08	-0.29	0.13
0.3	-0.53	0.5	-0.08	0.02	-0.64	0.29	-0.1
-0.38	-0.55	-0.62	-0.17		-0.12	-0.12
-0.03	0.01	0.36	-0.17		-0.5	0.01
-0.51	-0.2	-0.06	-0.368421		-0.56
-0.01	-0.15	0.24			0.06
-0.32	-0.184129	-0.11			-0.04
-0.1		0.29			-0.27
-0.02		-0.16			-0.0566861
-0.433048		-0.171429			0.0115942
-0.348435		-0.0909091
-0.43
0.14
-0.41
-0.4
-0.18
-0.33
-0.47
-0.02
-0.14
0.16
0.07
-0.23
-0.21
-0.22
0.54
-0.6
-0.56
-0.29
-0.38
-0.45
-0.24
-0.23
0.05
-0.42
0.01
0.08
-0.35
0.18
0.15
