# Supplementary material for: Postsynaptic plasticity of cholinergic synapses underlies the induction and expression of appetitive and familiarity memories in Drosophila
Source: eLife journal article supplement (doi:10.7554/elife.80445), 2022-10-17
Supplement: supp [file Source_data_pribbenow Fig 2e.xlsx]

## Sheet: Tabelle1
w1118xgal80	a5xW1118	a5xGal80
0.34	0.31	-0.03
0.23	0.42	0.15
0.56	0.24	0.03
0.24	0.23	0.09
0.56	0.2	0.15
0.46	0.46	0.12
	0.17	0.22
