# Supplementary material for: Postsynaptic plasticity of cholinergic synapses underlies the induction and expression of appetitive and familiarity memories in Drosophila
Source: eLife journal article supplement (doi:10.7554/elife.80445), 2022-10-17
Supplement: supp [file Source_data_pribbenow Fig 2f.xlsx]

## Sheet: Tabelle1
w1118xgal80,Vt1211	w1118xa2	a2xgal80,VT1211
0.214424	0.358181	0.21039
0.197724	0.0932112	0.184225
0.0557214	0.480454	0.237539
0.549321	0.528571	0.392437
0.747159	0.303136	0.0865874
0.196857	0.409009	0.461864
0.335758	0.596667	0.32958
0.525847	0.438914	0.205128
0.535714	0.106061	-0.165413
0.384615	0.6875	0.447059
0.369766	0.42069	-0.666667
0.0010582	0.484091	0.209615
0.694253	-0.0652174	0.623188
0.409357	0.378882	0.377143
0.577206	0.283333	-0.142857
0.269231	0.557692	-0.0511364
0.375		0.125
