# Supplementary material for: Postsynaptic plasticity of cholinergic synapses underlies the induction and expression of appetitive and familiarity memories in Drosophila
Source: eLife journal article supplement (doi:10.7554/elife.80445), 2022-10-17
Supplement: supp [file Source_data_pribbenow Fig 2g.xlsx]

## Sheet: Tabelle1
w1118xgal80	w1118xa5RNAi	a5 RNAi x Gal 80
0.58	0.5	0.21
0.49	0.64	0.41
-0.2	0.37	0.27
0.32	0.45	0.44
0.14	0.31	-0.21
0.5	0.49	-0.31
0.91	0.39	0.35
0.65	0.64	0.33
0.14	0.2	-0.02
0.17	0.25	-0.1
0.42	0.18	0.41
0.03	0.22	-0.06
-0.1	0.43	0.23
0.42	0.45	0.57
0.41	0.12	-0.43
0.63	0.44	-0.13
0.18	-0.27	0.66
0.27	0.09	0.28
0.66	0.38	-0.38
0.46	0.56	0.02
0.373277	-0.21	0.23
0.466667	-0.141595	0.342642
0.358221	0.162389	0.555556
0.435897	0.316587	0.116008
-0.289524	0.387843	-0.440385
	0.554717	-0.198939
	0.700399	-0.449472
