# Supplementary material for: Postsynaptic plasticity of cholinergic synapses underlies the induction and expression of appetitive and familiarity memories in Drosophila
Source: eLife journal article supplement (doi:10.7554/elife.80445), 2022-10-17
Supplement: supp [file Source_data_pribbenow Fig 2h.xlsx]

## Sheet: Tabelle1
w1118xGal80	w1118xDlg	Dlgxgal80
0.26	0.27	0.09
0.33	0.33	-0.07
0.44	0.31	0.17
0.23	0.4	-0.01
0.7	0.27	0.16
0.53	0.15	-0.07
0.48	0.34	0.19
0.44	0.33	0.23
0.37	0.23
0.29	0.5
0.26	0.21
