# Supplementary material for: Postsynaptic plasticity of cholinergic synapses underlies the induction and expression of appetitive and familiarity memories in Drosophila
Source: eLife journal article supplement (doi:10.7554/elife.80445), 2022-10-17
Supplement: supp [file Source_data_pribbenow Fig 3f.xlsx]

## Sheet: Tabelle1
pre	post
1	1.11053
1	1.01336
1	1.03547
1	1.00614
1	1.01498
1	1.01043
1	1.00238
1	1.08833
1	0.969614
1	1.05578
1	1.04954
1	0.890082
1	0.900255
