# Supplementary material for: Postsynaptic plasticity of cholinergic synapses underlies the induction and expression of appetitive and familiarity memories in Drosophila
Source: eLife journal article supplement (doi:10.7554/elife.80445), 2022-10-17
Supplement: supp [file Source_data_pribbenow Fig 3g.xlsx]

## Sheet: Tabelle1
pre	post
1	0.982751
1	1.00513
1	0.887382
1	1.02541
1	1.04959
1	0.961158
1	1.01339
1	1.014
1	1.04173
1	1.01833
