# Supplementary material for: Postsynaptic plasticity of cholinergic synapses underlies the induction and expression of appetitive and familiarity memories in Drosophila
Source: eLife journal article supplement (doi:10.7554/elife.80445), 2022-10-17
Supplement: supp [file Source_data_pribbenow Fig 3h.xlsx]

## Sheet: Tabelle1
pre	post
1	1.08931
1	1.03371
1	1.01101
1	1.09279
1	1.09109
1	1.03763
1	1.03798
1	1.10486
1	1.00741
1	1.03504
1	1.04813
1	1.04369
1	1.10632
1	1.03307
1	1.10598
1	1.06392
1	0.98629
1	1.10937
