# Supplementary material for: Postsynaptic plasticity of cholinergic synapses underlies the induction and expression of appetitive and familiarity memories in Drosophila
Source: eLife journal article supplement (doi:10.7554/elife.80445), 2022-10-17
Supplement: supp [file Source_data_pribbenow Fig 3i.xlsx]

## Sheet: Tabelle1
pre	post
1	1.05006
1	1.0558
1	1.00823
1	0.986303
1	0.892284
1	1.09122
1	1.13923
1	0.91994
1	1.12143
1	1.01216
1	1.02214
1	0.977794
1	1.11691
1	1.02725
1	1.04401
