# Supplementary material for: Postsynaptic plasticity of cholinergic synapses underlies the induction and expression of appetitive and familiarity memories in Drosophila
Source: eLife journal article supplement (doi:10.7554/elife.80445), 2022-10-17
Supplement: supp [file Source_data_pribbenow Fig 4b.xlsx]

## Sheet: Tabelle1
	subunit
	α1	88.6383	99.3219	117.375	98.507	68.7724	97.7527	73.9826	133.88	71.5159	65.7001	118.345	170.093	96.1158
	α2	115.042	114.15	118.343	120.781	83.8557	97.7586	96.089	114.609	103.993	110.492	94.1257	72.4912	58.2684
	α4	135.474	138.819	138.003	130.207	76.4899	88.3269	79.0526	114.687	98.6552	107.338	88.1498	62.2833	42.5141
	α5	128.763	125.144	113.126	121.114	76.8231	92.5762	81.9171	109.963	99.2693	103.956	90.1416	95.125	62.3332
	α6	107.693	121.735	106.402	99.4066	80.7645	98.4273	64.8751	110.215	91.2998	79.6114	106.726	143.661	91.03
	α7	112	114	120.653	108	92	106	100	120	107	102	92	66	59
	Dlg	103.558	110.533	122.047	119.753	63.2853	92.665	62.9879	146.272	87.8679	116.202	96.9276	99.966	77.9364
compartment		γ5	γ4	γ3	γ2	γ1	β'2	β2	β'1	β1	α1/α'1	α2/α'2	α'3	α3
