# Supplementary material for: Postsynaptic plasticity of cholinergic synapses underlies the induction and expression of appetitive and familiarity memories in Drosophila
Source: eLife journal article supplement (doi:10.7554/elife.80445), 2022-10-17
Supplement: supp [file Source_data_pribbenow Fig 4c.xlsx]

## Sheet: Tabelle1
control	α2 RNAi	α5 RNAi	dlg RNAi
0.09	-3.14	-21.85	-17.2795
15.7	-1.4	0.54	-16.266
-9.23	-10.96	-0.4	-7.11034
-2.93	-7.88	-4.85	-8.09821
10.07	-4.1	0.18	-8.38888
-5.17	-10.22	-13.28	-31.1196
-4.02	-7.08	0.15	2.87595
-2.86	-11.08	0.3	-10.4822
-8.39	-16.72		-14.6733
0.42	-10.46		4.44324
23.37	10.42
-10.22	-3.33
-3.98	0.31
-6.37	-7.71
-7.88	-11.91
4.64	-8.53
2.31	-4.89
4.44	-4.5
	-21.41
	-4.75
