# Supplementary material for: Postsynaptic plasticity of cholinergic synapses underlies the induction and expression of appetitive and familiarity memories in Drosophila
Source: eLife journal article supplement (doi:10.7554/elife.80445), 2022-10-17
Supplement: supp [file Source_data_pribbenow Fig 4d.xlsx]

## Sheet: Tabelle1
control	α2 RNAi	α5 RNAi	dlg RNAi
4.72	-21.57	-21.39	-23.3517
-6.75	-10.02	-31.86	-25.3683
21.79	-14.03	-8.93	-15.0957
-2.9	2.18	1.03	-5.54502
0.08	-8.04	-19.96	-13.464
-5.96	7.05	-2.89	-5.74302
33.55	-3.5	-33.83	-15.7044
-11.04	-1.76	1.76	-11.1999
-13.46	-18.94	-7.44	-11.0861
5.4	-16.67		-4.78579
10.48	-18.73
5.29	-9.19
-1.74	-7.35
-4.14	-16.21
-9.56	-15.26
-17.32	-0.8
-3.63	-8.56
-4.79	2.53
	-4.81
	-3.73
