# Supplementary material for: Postsynaptic plasticity of cholinergic synapses underlies the induction and expression of appetitive and familiarity memories in Drosophila
Source: eLife journal article supplement (doi:10.7554/elife.80445), 2022-10-17
Supplement: supp [file Source_data_pribbenow Fig 4f.xlsx]

## Sheet: Tabelle1
control	α2 RNAi	α5 RNAi	dlg RNAi
-12.75	-1.15	-11.42	8.97917
-2.05	-27.77	-15	29.7621
1.59	2.21	-49.22	-3.38156
-1.62	10.84	-49.91	16.4288
-3.55	-5.43	-3.53	-2.83378
1.33	-3.62	-5.53	13.8875
37.24	-15.65	-8.75	0
5.53	8.62	-2.95	-7.86501
-2.7	0.13	0.9	-2.71333
-15.79	2.08	-8.58	-25.0176
-9.02		-30.19
-9.02		-12.99
-12.52		-15.74
-12.72		-27.34
-0.1		-11.36
40.66		-10.15
9.19		-39.56
-4.7		-5.73
-9		-0.1
		0.5
		-11.13
		0.53
		-2.07
		-0.46
		-37.18
		-0.98
		-18.66
		-12.8
