# Supplementary material for: Postsynaptic plasticity of cholinergic synapses underlies the induction and expression of appetitive and familiarity memories in Drosophila
Source: eLife journal article supplement (doi:10.7554/elife.80445), 2022-10-17
Supplement: supp [file Source_data_pribbenow Fig 5d.xlsx]

## Sheet: Tabelle1
control	α2 RNAi	α5 RNAi
8.6388	7.6904	7.3986
7.9188	1.9677	1.838
0.77865	13.888	13.037
1.6263	16.617	8.3251
0.041226	9.7481	9.3913
0.30294	4.0261	13.257
9.8267	0.65405	10.865
5.5484	1.5321	24.164
-0.62386	2.3161	1.3169
6.9086	3.4792	-0.29146
	7.7146	12.016
	6.8496	12.884
