# Supplementary material for: Postsynaptic plasticity of cholinergic synapses underlies the induction and expression of appetitive and familiarity memories in Drosophila
Source: eLife journal article supplement (doi:10.7554/elife.80445), 2022-10-17
Supplement: supp [file Source_data_pribbenow Fig 5e.xlsx]

## Sheet: Tabelle1
Int MCH FIRST	Int MCH FIFTH
8.6388	6.3661
7.9188	3.7593
0.77865	5.0613
1.6263	10.192
0.041226	-0.29008
0.30294	4.9363
9.8267	4.0782
5.5484	9.0599
-0.62386	-0.61021
4.0308	0.16202
