# Supplementary material for: Postsynaptic plasticity of cholinergic synapses underlies the induction and expression of appetitive and familiarity memories in Drosophila
Source: eLife journal article supplement (doi:10.7554/elife.80445), 2022-10-17
Supplement: supp [file Source_data_pribbenow Fig 5f.xlsx]

## Sheet: Tabelle1
Int MCH FIRST	Int MCH FIFTH
7.6904	7.2287
1.9677	0.88938
13.888	11.535
16.617	9.7968
9.7481	8.248
4.0261	4.1484
0.65405	-1.1123
1.5321	3.6834
2.3161	3.9267
3.4792	4.6445
7.7146	5.9058
6.8496	4.3579
