# Supplementary material for: Postsynaptic plasticity of cholinergic synapses underlies the induction and expression of appetitive and familiarity memories in Drosophila
Source: eLife journal article supplement (doi:10.7554/elife.80445), 2022-10-17
Supplement: supp [file Source_data_pribbenow Fig 5g.xlsx]

## Sheet: Tabelle1
Int MCH FIRST	Int MCH FIFTH
7.3986	3.9338
1.838	7.7368
13.037	6.5831
8.3251	4.3262
9.3913	-6.0795
13.257	-1.3421
10.865	4.3512
24.164	4.2765
1.3169	3.484
-0.29146	1.6801
12.016	6.4339
12.884	3.3204
