# Supplementary material for: Postsynaptic plasticity of cholinergic synapses underlies the induction and expression of appetitive and familiarity memories in Drosophila
Source: eLife journal article supplement (doi:10.7554/elife.80445), 2022-10-17
Supplement: supp [file Source_data_pribbenow Fig 5k.xlsx]

## Sheet: Tabelle1
pre	post
2.25	1.28571
1.56696	0.602679
1.32589	0.924107
1.125	0.602679
0.763393	0.723214
0.642857	0.5625
0.522321	0.602679
0.321429	0.321429
0.482143	0.241071
