# Supplementary material for: Postsynaptic plasticity of cholinergic synapses underlies the induction and expression of appetitive and familiarity memories in Drosophila
Source: eLife journal article supplement (doi:10.7554/elife.80445), 2022-10-17
Supplement: supp [file Source_data_pribbenow Fig 5l.xlsx]

## Sheet: Tabelle1
pre	post
2.14839	2.03226
1.33548	0.522581
1.27742	1.39355
0.929032	1.74194
0.812903	0.348387
0.464516	1.74194
0.870968	1.10323
0.522581	0.406452
0.63871	0.812903
