# Supplementary material for: Postsynaptic plasticity of cholinergic synapses underlies the induction and expression of appetitive and familiarity memories in Drosophila
Source: eLife journal article supplement (doi:10.7554/elife.80445), 2022-10-17
Supplement: supp [file Source_data_pribbenow Fig 5m.xlsx]

## Sheet: Tabelle1
pre	post
1.89231	1.06154
1.2	2.81539
1.43077	0.969231
1.43077	0.876923
1.10769	1.24615
1.06154	0.830769
1.06154	1.47692
0.784615	0.784615
0.738462	0.507692
0.692308	1.01538
0.369231	0.276923
0.230769	0.323077
