# Supplementary material for: Postsynaptic plasticity of cholinergic synapses underlies the induction and expression of appetitive and familiarity memories in Drosophila
Source: eLife journal article supplement (doi:10.7554/elife.80445), 2022-10-17
Supplement: supp [file Source_data_pribbenow Fig 5n.xlsx]

## Sheet: Tabelle1
pre	post
1.48696	2.26957
1.33044	1.72174
1.25217	1.33044
1.09565	0.469565
1.01739	1.09565
1.01739	0.234783
0.704348	1.95652
0.626087	0.547826
0.469565	0.547826
