# Supplementary material for: Postsynaptic plasticity of cholinergic synapses underlies the induction and expression of appetitive and familiarity memories in Drosophila
Source: eLife journal article supplement (doi:10.7554/elife.80445), 2022-10-17
Supplement: supp [file Source_data_pribbenow Fig 6d,e.xlsx]

## Sheet: Tabelle1
Time (mins)	DA Only											MCH Only											MCH + DA
0	0	0	0	0	0	0	0	0	0	0		0	0	0	0	0	0	0	0	0	0		0	0	0	0	0	0	0	0	0
10	1.84501	3.18343	4.11786	-3.85403	6.13301	3.20446	1.94624	-1.0059	-32.0004	3.62832		-4.78172	1.00467	13.8266	6.15637	9.85617	12.3579	11.3694	1.64845	14.4424	4.66185		-12.6777	3.3212	0.297918	4.99292	0.865179	3.80614	1.83238	9.21362	4.241
20	5.27597	-6.34855	-8.58749	-2.6116	6.36104	-3.73646	-3.38721	-1.45966	-28.1869	6.90509		5.19969	4.4356	31.4243	9.4706	10.8951	11.9478	7.27327	-2.5967	17.8179	2.89471		-7.67058	8.14416	-0.885	8.03027	3.45424	3.41059	6.57608	6.82375	1.78143
