# Supplementary material for: Postsynaptic plasticity of cholinergic synapses underlies the induction and expression of appetitive and familiarity memories in Drosophila
Source: eLife journal article supplement (doi:10.7554/elife.80445), 2022-10-17
Supplement: supp [file Source_data_pribbenow Fig 7b.xlsx]

## Sheet: Tabelle1
KC trial 2-4	KC trial 8-10	MBON trial 2-4	MBON trial 8-10
1.01	0.82	0.13	0.1
0.7	0.76	0.15	0.08
0.83	0.7	0.2	0.12
0.85	0.8	0.8	0.14
0.85	0.82	0.11	0.09
0.98	1.12	0.66	0.07
0.97	0.78	0.45	0.05
0.7	0.73	0.5	0.14
0.98	0.84	0.4	0.08
0.98	1.01	0.38	0.06
0.9	1.1	0.3	0.05
0.78	0.8	0.34	0.04
0.78	0.88	0.28	0.07
0.9	0.81	0.27	0.08
0.9	0.97	0.23	0.03
