# Supplementary material for: Postsynaptic plasticity of cholinergic synapses underlies the induction and expression of appetitive and familiarity memories in Drosophila
Source: eLife journal article supplement (doi:10.7554/elife.80445), 2022-10-17
Supplement: supp [file Source_data_pribbenow Fig 7e.xlsx]

## Sheet: Tabelle1
Time [min]	odor Fly 1	Fly 2	Fly 3	Fly 4		Time [min]	air Fly 1	Fly 2	Fly 3	Fly 4	Fly 5	Fly 6
0	3.16	15.83	4.98	4.77		0	1.4	0.34	-1.5	5.63	-1.32	-0.2
5	12.76	22.17	2	8.81		5	-1.22	-7.43	4.77	3.48	-3.32	-1.11
10	12.72	21.91	-1.06	9.7		10	-3.7	-11.47	3.92	2.39	0.46	0.06
15	17.62	18.23	6.56	9.68		15	-7.61	-14.82	5.33	0.96	-2.92	-0.18
20	25.36	17.6	6.19	12.52		20	-8.72	-11.77	6.06	-1.18	-3.81	-1.96
30	30.35	13.5	3.24	14.1		30	-12.15	-13.05	-9.12	-1.25	-3.55	-5.22
60	14.75	15.53	-9.73	9.84		60	-4.95	-11.45	-16.44	-3.6	-4.63	-5.86
