# Supplementary material for: Postsynaptic plasticity of cholinergic synapses underlies the induction and expression of appetitive and familiarity memories in Drosophila
Source: eLife journal article supplement (doi:10.7554/elife.80445), 2022-10-17
Supplement: supp [file Source_data_pribbenow Fig 7f.xlsx]

## Sheet: Tabelle1
Time	odor Fly 1	Fly 2	Fly 3	Fly 4	Fly 5	Fly 6	Fly 7		air Fly 1	Fly 2	Fly 3	Fly 4	Fly 5
0	19.12	3.39	1.24	-8.01	-1.7	3.13	2.24		-3.92	-1.55	0.95	-1.7	5.85
5	13.58	-0.25	6.92	-13.56	1.17	3.8	2.48		-9.1	-2.78	-1.22	-3.86	4.97
10	14.85	0.09	4.92	-17.51	0.26	-0.29	1.33		-13.61	-1.4	-2.27	-10.67	2.1
15	9.92	2.35	5.38	-16.31	2	-0.52	-0.98		-12.07	-1.71	-5.31	-12.04	-0.37
20	5.92	14.14	1.21	-19.73	-1.87	-2.11	-4.79		-11.58	-0.34	-6.58	-10.74	1.35
30	2.13	12.79	5.92	-20.51	9.03	-1.66	4.05		-12.86	-1.26	-7.08	7.71	-1.31
60	1.31	0.95	-9.8	-11.33	-14.82	-8.58	-1.07		-21.05	-5.86	-7.93	-5.5	-12.28
