# Supplementary material for: Postsynaptic plasticity of cholinergic synapses underlies the induction and expression of appetitive and familiarity memories in Drosophila
Source: eLife journal article supplement (doi:10.7554/elife.80445), 2022-10-17
Supplement: supp [file Source_data_pribbenow Fig 7g.xlsx]

## Sheet: Tabelle1
a2GFP	a2GFP a2RNAi	a2GFP a5RNAi
37.91	0.28	0.95
21.91	0.37	0.49
10.91	0.02	0.35
21.91	0.2	-0.25
	0.24	0
