# Supplementary material for: Postsynaptic plasticity of cholinergic synapses underlies the induction and expression of appetitive and familiarity memories in Drosophila
Source: eLife journal article supplement (doi:10.7554/elife.80445), 2022-10-17
Supplement: supp [file Source_data_pribbenow Fig 8a.xlsx]

## Sheet: Tabelle1
	WILDTYPE	α2-RNAi	α5-RNAi
1	0.73	0.86	0.5
2	0.5	0.8	0.33
3	0.33	0.89	0.4
4	0.29	0.57	0.4
