# Supplementary material for: Postsynaptic plasticity of cholinergic synapses underlies the induction and expression of appetitive and familiarity memories in Drosophila
Source: eLife journal article supplement (doi:10.7554/elife.80445), 2022-10-17
Supplement: supp [file Source_data_pribbenow Fig 8c.xlsx]

## Sheet: Tabelle1
WILDTYPE	α2-RNAi	α5-RNAi
0.5	0.8	0.33
0.33	0.89	0.4
0.29	0.57	0.4
0.43	0.5	0.22
0.5	0.67	0.5
0.2	0.33	0.43
0.33	0.63	0.33
0.33	0.2	0.33
0.25	0.71	0.6
