# Supplementary material for: Postsynaptic plasticity of cholinergic synapses underlies the induction and expression of appetitive and familiarity memories in Drosophila
Source: eLife journal article supplement (doi:10.7554/elife.80445), 2022-10-17
Supplement: supp [file Source_data_pribbenow Fig 8d.xlsx]

## Sheet: Tabelle1
WILDTYPE	α2-RNAi	α5-RNAi
0.333333	0.4	0.8
0.5	0.6	0.666667
0.583333	0.466667	0.6
0.583333	0.4	0.6
0.583333	0.866667	0.866667
0.416667	0.4	0.533333
0.5	0.533333	0.733333
0.5	0.333333	0.6
0.333333	0.466667	0.533333
