# Supplementary material for: Postsynaptic plasticity of cholinergic synapses underlies the induction and expression of appetitive and familiarity memories in Drosophila
Source: eLife journal article supplement (doi:10.7554/elife.80445), 2022-10-17
Supplement: supp [file source_data_pribbenow_Fig 1a.xlsx]

## Sheet: Tabelle1
w1118xShi	R13F02 x w1118	R13F02 x Shi
-0.77	-0.58	-0.51
-0.81	-0.74	-0.43
-0.9	-0.84	-0.56
-0.76	-0.69	-0.69
-0.57	-0.67	-0.63
-0.78	-0.76	-0.47
-0.21	-0.48	-0.49
-0.62
