# Supplementary material for: Postsynaptic plasticity of cholinergic synapses underlies the induction and expression of appetitive and familiarity memories in Drosophila
Source: eLife journal article supplement (doi:10.7554/elife.80445), 2022-10-17
Supplement: supp [file source_data_pribbenow_Fig 1b.xlsx]

## Sheet: Tabelle1
w1118xShi	R13F02 x W1118	R13F02 x shi
0.26	0.14	-0.14
0.16	-0.28	-0.1
-0.06	-0.19	-0.05
0.11	0.05	-0.11
0.2	-0.03	-0.1
0.44	-0.02	-0.05
0.31	0.18	0.11
0.41	0.22	-0.13
0.5	0.41	-0.09
0.61	0.29	0.35
	-0.04	-0.1
	0.86
	0.42
	0.61
	0.8
	0.66
