# Supplementary material for: Postsynaptic plasticity of cholinergic synapses underlies the induction and expression of appetitive and familiarity memories in Drosophila
Source: eLife journal article supplement (doi:10.7554/elife.80445), 2022-10-17
Supplement: supp [file source_data_pribbenow_Fig 1c.xlsx]

## Sheet: Tabelle1
w1118xShi	MB011B x W1118	MB011B x shi
-0.111492	0.182005	0.733333
0.213333	0.367059	0.27451
-0.00737564	0.185157	0.0130952
-0.15369	0.227827	0.0030303
-0.142373	0.162007	-0.309579
0.310559	0.294635	-0.282051
-0.0446474	0.152176	0.227368
-0.276191	0.0545455	-0.166667
-0.0860846	0.141081	0.363636
0.0901099	0.175824	0.380645
-0.196023	0.307591	0.5
-0.247246	0.246322	0.297297
0.262443	0.227273	0.0694444
0.17	-0.0788732	0.260417
0.209677	0.179402
0.424924	-0.194444
0.407859	0.00925926
0.564815	0.61854
0.438788	0.441177
0.219355	0.604651
0.30069	0.179402
0.27168	0.444444
0.370407	0.419527
0.170251
