# Supplementary material for: Postsynaptic plasticity of cholinergic synapses underlies the induction and expression of appetitive and familiarity memories in Drosophila
Source: eLife. 2022 Oct 17;11:e80445. doi: 10.7554/eLife.80445 (PMC9733945; doi:10.7554/eLife.80445)
Supplement: Supplementary file 1. [file elife-80445-supp1.xlsx]

## Sheet: Statistics Pribbenow et al 2022
Figure	condition	statistical test		driver line (Gal4)	UAS-line	other line	4th line	mean ±SEM	n		p Value
1a	block of neurons during training, aversive learning	one-way ANOVA followed by Tukey’s test									p > 0.05
			a		Shi	w1118		-0.68 ± 0.08	8	a-b	p > 0.05
			b	R13F02		w1118		-0.68 ± 0.05	7	a-c	p > 0.05
			c	R13F02	Shi			-0.54 ± 0.04	7	b-c	p > 0.05
1b	block of neurons during training, appetitive learning	Kruskal-Wallis followed by Dunn’s test									p < 0.01
			a		Shi	w1118		0.29 ± 0.06	10	a-b	p > 0.05
			b	R13F02		w1118		0.26 ± 0.09	16	a-c	p < 0.01
			c	R13F02	Shi			-0.04 ±0.04	11	b-c	p < 0.05
1c	block of neurons during training, appetitive learning	one-way ANOVA followed by Tuckey’s test									p > 0.05
			a		Shi	w1118		0.13 ± 0.05	24	a-b	p > 0.05
			b	MB011B		w1118		0.23 ± 0.04	23	a-c	p > 0.05
			c	MBO11B	Shi			0.17 ± 0.08	14	b-c	p > 0.05
	condition	statistical test		driver line (Gal4)	UAS-line	other line		mean ±SEM	n		p Value
2a	0hr appetitive	one-way ANOVA followed by Dunnett’s test									p < 0.01
			a	MB011B		w1118		0.25 ± 0.03	20
			b	MB011B	α1 RNAi			0.13 ± 0.05	13	a-b	p > 0.05
			c	MB011B	α2 RNAi			0.30 ± 0.09	13	a-c	p > 0.05
			d	MB011B	α3 RNAi			0.27± 0.06	10	a-d	p > 0.05
			e	MB011B	α4 RNAi			0.29 ± 0.07	8	a-e	p > 0.05
			f	MB011B	α5 RNAi			-0.05 ± 0.08	9	a-f	p < 0.01
			g	MB011B	α6 RNAi			0.22 ± 0.05	8	a-g	p > 0.05
			h	MB011B	α7 RNAi			0.20 ±0.09	8	a-h	p > 0.05
			i	MB011B	Dlg RNAi			0.31 ± 0.06	8	a-i	p > 0.05
2b	3hr appetitive	Kruskal-Wallis followed by Dunn’s test									p <0.001
			a	MB011B		w1118		0.16 ± 0.03	38
			b	MB011B	α1 RNAi			0.03 ± 0.05	24	a-b	p < 0.05
			c	MB011B	α2 RNAi			-0.03 ± 0.05	26	a-c	p < 0.01
			d	MB011B	α3 RNAi			0.12 ± 0.04	22	a-d	p > 0.05
			e	MB011B	α4 RNAi			0.21 ± 0.03	12	a-e	p > 0.05
			f	MB011B	α5 RNAi			0.02 ± 0.04	26	a-f	p < 0.05
			g	MB011B	α6 RNAi			0.14 ± 0.04	15	a-g	p > 0.05
			h	MB011B	α7 RNAi			0.10 ± 0.06	16	a-h	p > 0.05
			i	MB011B	Dlg RNAi			0.01 ± 0.03	18	a-i	p < 0.05
2c	0hr aversive	Kruskal-Wallis followed by Dunn’s test									p > 0.05
			a	MB011B		w1118		-0.60 ±0.07	12
			b	MB011B	α1 RNAi			-0.56 ± 0.06	8	a-b	p > 0.05
			c	MB011B	α2 RNAi			-0.52 ± 0.07	6	a-c	p > 0.05
			d	MB011B	α3 RNAi			-0.51 ± 0.05	6	a-d	p > 0.05
			e	MB011B	α4 RNAi			-0.45 ± 0.07	8	a-e	p > 0.05
			f	MB011B	α5 RNAi			-0.49 ±0.10	6	a-f	p > 0.05
			g	MB011B	α6 RNAi			-0.53 ± 0.06	8	a-g	p > 0.05
			h	MB011B	α7 RNAi			-0.56 ± 0.05	8	a-h	p > 0.05
			i	MB011B	Dlg RNAi			-0.47 ± 0.06	8	a-i	p > 0.05
2d	3hr aversive	Kruskal-Wallis followed by Dunn’s test									p <0.01
			a	MB011B		w1118		-0.24 ± 0.03	61
			b	MB011B	α1 RNAi			-0.20 ± 0.04	28	a-b	p > 0.05
			c	MB011B	α2 RNAi			-0.13 ± 0.05	32	a-c	p > 0.05
			d	MB011B	α3 RNAi			-0.11 ± 0.05	26	a-d	p > 0.05
			e	MB011B	α4 RNAi			-0.18 ± 0.04	23	a-e	p > 0.05
			f	MB011B	α5 RNAi			-0.23 ± 0.03	31	a-f	p > 0.05
			g	MB011B	α6 RNAi			-0.09 ± 0.05	25	a-g	p > 0.05
			h	MB011B	α7 RNAi			-0.00 ± 0.05	23	a-h	p <0.001
			i	MB011B	Dlg RNAi			-0.16 ± 0.05	21	a-i	p > 0.05
2e	0hr appetitive Gal80 α5	Kruskal-Wallis followed by Dunn’s test									p <0.001
			a	VT1211		tubP-GAL80ts	w1118	0.40 ± 0.06	6	a-b	p > 0.05
			b		α5 RNAi		w1118	0.29 ± 0.04	7	a-c	p <0.01
			c	VT1211	α5 RNAi	tubP-GAL80ts		0.10 ± 0.03	7	b-c	p <0.05
2f	3hr appetitive Gal80 α2	one-way ANOVA followed by Tuckey’s test									p <0.05
			a	VT1211		tubP-GAL80ts	w1118	0.38 ± 0.05	17	a-b	p > 0.05
			b		α2 RNAi		w1118	0.38 ± 0.05	16	a-c	p <0.05
			c	VT1211	α2 RNAi	tubP-GAL80ts		0.17 ± 0.32	17	b-c	p <0.05
2g	3hr appetitive Gal80 α5	one-way ANOVA followed by Tuckey’s test									p <0.01
			a	VT1211		tubP-GAL80ts	w1118	0.34 ± 0.06	25	a-b	p > 0.05
			b		α5 RNAi		w1118	0.32 ± 0.05	27	a-c	p <0.05
			c	VT1211	α5 RNAi	tubP-GAL80ts		0.10 ± 0.07	27	b-c	p <0.05
2h	3hr appetitive Gal80 Dlg	one-way ANOVA followed by Tuckey’s test									p <0.0001
			a	VT1211		tubP-GAL80ts	w1118	0.39 ± 0.04	11	a-b	p > 0.05
			b		Dlg RNAi		w1118	0.30 ± 0.03	11	a-c	p <0.0001
			c	VT1211	Dlg RNAi	tubP-GAL80ts		0.09 ± 0.04	8	b-c	p <0.01
Figure	condition	statistical test	Genotype						n		p Value
3f	ACh only	ratio paired t test	control						13		p >0.05
3g	DA only	ratio paired t test	control						10		p >0.05
3h	ACh+DA	ratio paired t test	control						18		p <0.05
3i	ACh+DA	ratio paired t test	α2 RNAi						15		p >0.05
Figure	condition	statistical test		driver line (Gal4)	UAS-line	other line	mean ±SEM	n		p Value
4c	α2 GFP in γ5/γ4	Kruskal-Wallis followed by Dunn’s test								p <0.05
			a			α2 GFP	0.00 ±2.12	18
			b	VT1211	α2 RNAi	α2 GFP	-6.97 ± 1.47	20	a-b	p <0.05
			c	VT1211	α5 RNAi	α2 GFP	-4.90 ± 2.95	8	a-c	p > 0.05
			d	VT1211	Dlg RNAi	α2 GFP	-10.61 ± 3.24	10	a-d	p <0.05
4d	α2 GFP in β'2/β'1	one-way ANOVA followed by Dunnett’s test								p <0.01
			a			α2 GFP	0.00 ± 2.93	18
			b	VT1211	α2 RNAi	α2 GFP	-8.37 ± 1.80	20	a-b	p <0.05
			c	VT1211	α5 RNAi	α2 GFP	-13,72 ± 4.52	9	a-c	p <0.01
			d	VT1211	Dlg RNAi	α2 GFP	-13.13 ± 2.25	10	a-d	p <0.01
4e	α5 GFP in γ5/γ4	Kruskal-Wallis followed by Dunn’s test								p <0.001
			a			α5 GFP	0.00 ± 1.43	19
			b	VT1211	α2 RNAi	α5 GFP	-2.43 ± 2.84	9	a-b	p > 0.05
			c	VT1211	α5 RNAi	α5 GFP	-9.06 ± 1.62	28	a-c	p <0.001
			d	VT1211	Dlg RNAi	α5 GFP	-0.12 ± 3.56	10	a-d	p > 0.05
4f	α5 GFP in β'2/β'1	Kruskal-Wallis followed by Dunn’s test								p <0.01
			a			α5 GFP	0.00 ±3.50	19
			b	VT1211	α2 RNAi	α5 GFP	-2.97 ± 3.61	10	a-b	p > 0.05
			c	VT1211	α5 RNAi	α5 GFP	-13.91 ± 2.81	28	a-c	p <0.05
			d	VT1211	Dlg RNAi	α5 GFP	2.73 ± 4.80	10	a-d	p > 0.05
										p > 0.05
Figure	condition	statistical test		driver line (Gal4)		mean first ±SEM	mean fifth ±SEM	n		p Value
5d	MCH response area under curve	One-way Anova followed by Dunnett’s test	a	VT1211, GCaMP6f	w1118	4.10 ± 1.28		10	a-b	p >0.05
			b	VT1211, GCaMP6f	α2 RNAi	6.37 ± 1.46		12	a-c	p <0.05
			c	VT1211, GCaMP6f	α5 RNAi	9.52 ± 1.92		12
5e	MCH response	paired t-test (two tailed)		VT1211, GCaMP6f	w1118	3.81 ± 1.25	4.27 ±1.18	10		p >0.05
5f	MCH response	paired t-test (two tailed)		VT1211, GCaMP6f	α2 RNAi	6.37 ± 1.46	5.27 ± 1.03	12		p >0.05
5g	MCH response	Wilcoxon (two tailed)		VT1211, GCaMP6f	α5 RNAi	9.52 ± 1.92	3.23 ± 1.09	12		p <0.05
5k	control paired training	paired t-test (two tailed)		VT1211, GCaMP6f	w1118	1.00 ± 0.21	0.65 ± 0.10	9		p <0.05
5l	α2 RNAi paired training	paired t-test (two tailed)		VT1211, GCaMP6f	α2 RNAi	1.00 ± 0.18	1.12± 0.21	9		p >0.05
5m	control unpaired training	Wilcoxon matched-pairds signed rank test		VT1211, GCaMP6f	w1118	1.00 ± 0.14	1.02 ± 0.19	12		p >0.05
5n	α2 RNAi unpaired training	paired t-test (two tailed)		VT1211, GCaMP6f	α2 RNAi	1.00 ± 0.11	1.13 ± 0.24	9		p >0.05
Figure	condition					mean first ± SEM		n
6d	0	DA Only				0 ± 0		10
	0	MCH + DA				0 ± 0		9
	0	MCH Only				0 ± 0		10
	10	DA Only				-1.28 ± 3.53		10
	10	MCH + DA				1.22 ± 1.76		9
	10	MCH Only				5.98 ± 1.67		10
	20	DA Only				-3.58 ± 3.22		10
	20	MCH + DA				2.61 ± 1.48		9
	20	MCH Only				8.34 ± 2.44		10
6e mean			statistical test				estimate ± SEM	n	contrast	df	t.ratio	p Value
	DA Only	a	Pairwise comparisons of fixed effects in linear mixed model; Degrees-of-freedom method: kenward-roger P value adjustment: tukey method for comparing a family of 3 estimates				-0.14± -0.09	10	a-c	77.2	2.303	p >0.05
	MCH Only	b	Pairwise comparisons of fixed effects in linear mixed model; Degrees-of-freedom method: kenward-roger P value adjustment: tukey method for comparing a family of 3 estimates				0.49 ± -0.09	10	a-b	75.1	5.343	p <0.001
	MCH + DA	c	Pairwise comparisons of fixed effects in linear mixed model; Degrees-of-freedom method: kenward-roger P value adjustment: tukey method for comparing a family of 3 estimates				0.14 ± -0.09	9	c-b	77.2	2.866	p <0.05
Fig	condition	statistical test				mean ±SEM	n		p Value
7b	odor responses	Kruskal-Wallis followed by Dunn’s test							p < 0.0001
			a	KC trial 2-4		0.87 ± 0.03	15	a-b	p >0.05
			b	KC trial 8-10		0.86 ± 0.03	15
			c	MBON trial 2-4		0.35 ± 0.05	15	c-d	p<0.05
			d	MBON trial 8-10		0.08 ± 0.01	15
7e						mean odor ±SEM	mean air ±SEM	n odor	n air	p Value
	0 min recovery, a2GFP	multiple t-tests one per row correction with Sidak-Bonferroni method				7.19 ±2.91	0.73 ± 1.08	4	6	p >0.05
	5 min recovery, a2GFP					11.44 ± 4.21	-0.81 ± 1,83			p >0.05
	10 min recovery, a2GFP					10.82 ± 4,74	-1.39 ± 2.27			p >0.05
	15 min recovery, a2GFP					13.02 ± 2.90	-0.321 ±2,91			p<0.01
	20 min recovery, a2GFP					15.42 ±4.05	-3.56 ± 2.55			p<0.01
	30 min recovery, a2GFP					15.30 ± 5,60	-7.39 ± 1.96			p<0.01
	60 min recovery, a2GFP					7. 60 ± 5.91	-7.82 ±2.06			p >0.05
7f
	0 min recovery, a5GFP	multiple t-tests one per row correction with Sidak-Bonferroni method				2.77 ±3.11	-0.07 ± 1.67	7	5	p >0.05
	5 min recovery, a5GFP					2.02 ± 3.12	-2,40 ±2.67			p >0.05
	10 min recovery, a5GFP					0.52 ± 3.62	-5.17 ± 2.98			p >0.05
	15 min recovery, a5GFP					0.26 ±3.10	-6.30 ± 2.48			p >0.05
	20 min recovery, a5GFP					-1.03 ± 3.93	-5.58 ± 2.64			p >0.05
	30 min recovery, a5GFP					1.68 ± 4.10	-2.96 ± 3.42			p >0.05
	60 min recovery, a5GFP					-6.19 ±2.46	-10. 52 ± 2.90			p >0.05
7g				line 1	line 2	line 3	mean odor ±SEM	n		p Value
	30 min recovery	Kruskal-Wallis followed by Dunn’s test	a	α2 GFP	MB027B		23.16 ± 5.56	4	a-b	p<0.05
			b	α2 GFP	MB027B	α2 RNAi	0.22 ± 0.06	5	a-c	p<0.05
			c	α2 GFP	MB027B	α5 RNAi	0.31 ± 0.21	5
						mean ±SEM	n
8c	stop grooming	one-way ANOVA followed by Dunnett’s test								p < 0.01
			a	MB027B	w1118	0.35 ± 0.04	9
			b	MB027B	α2 RNAi	0.59 ± 0.07	9	a-b		p < 0.01
			c	MB027B	α5 RNAi	0.39 ± 0.04	9	a-c		p >0.05
8d	initial grooming	Kruskal-Wallis followed by Dunn’s test								p < 0.01
			a	MB027B	w1118	0.48 ± 0.03	9
			b	MB027B	α2 RNAi	0.50 ± 0.05	9	a-b		p > 0.05
			c	MB027B	α5 RNAi	0.66 ± 0.04	9	a-c		p < 0.05
