# Supplementary figures and images for: Postsynaptic plasticity of cholinergic synapses underlies the induction and expression of appetitive and familiarity memories in Drosophila
Source: eLife journal article supplement (doi:10.7554/elife.80445), 2022-10-17

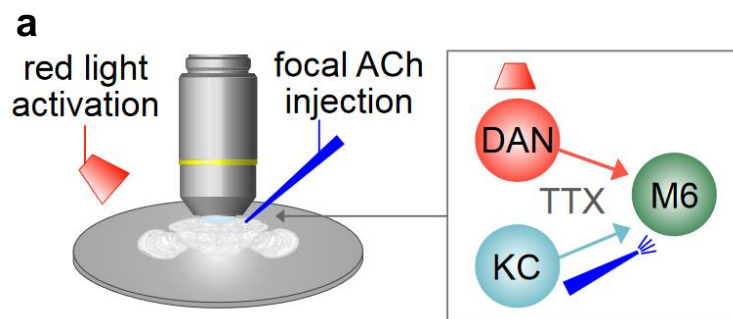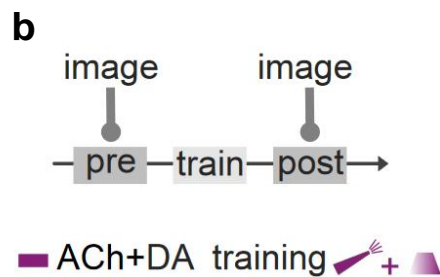

**c** no CsChrimson

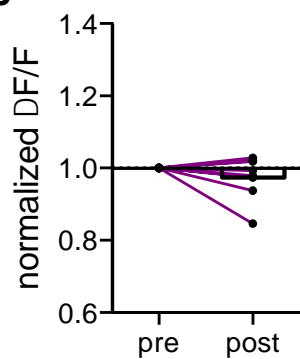

**d** no R58E02

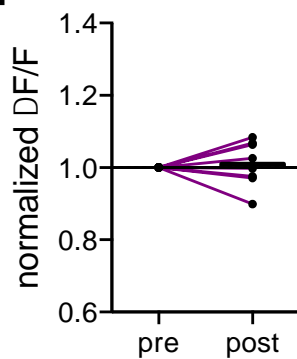

**e**

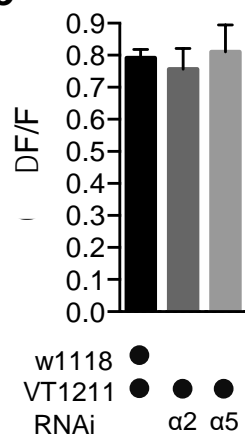

**f**

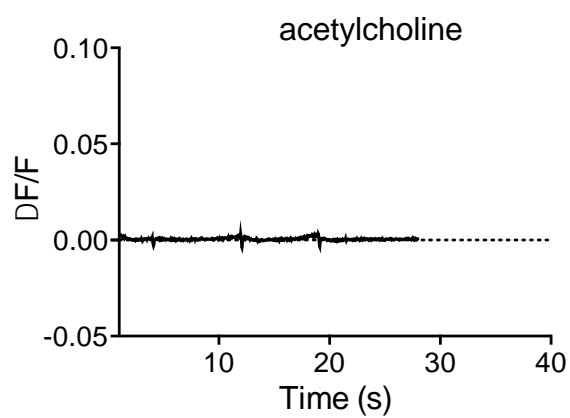

**g**

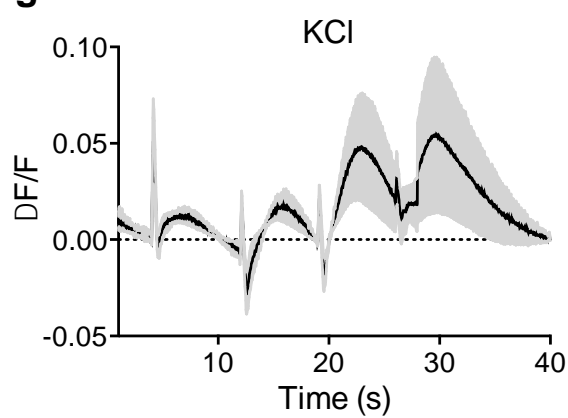

Supplement: supp [file elife-80445-supp-v1.zip]

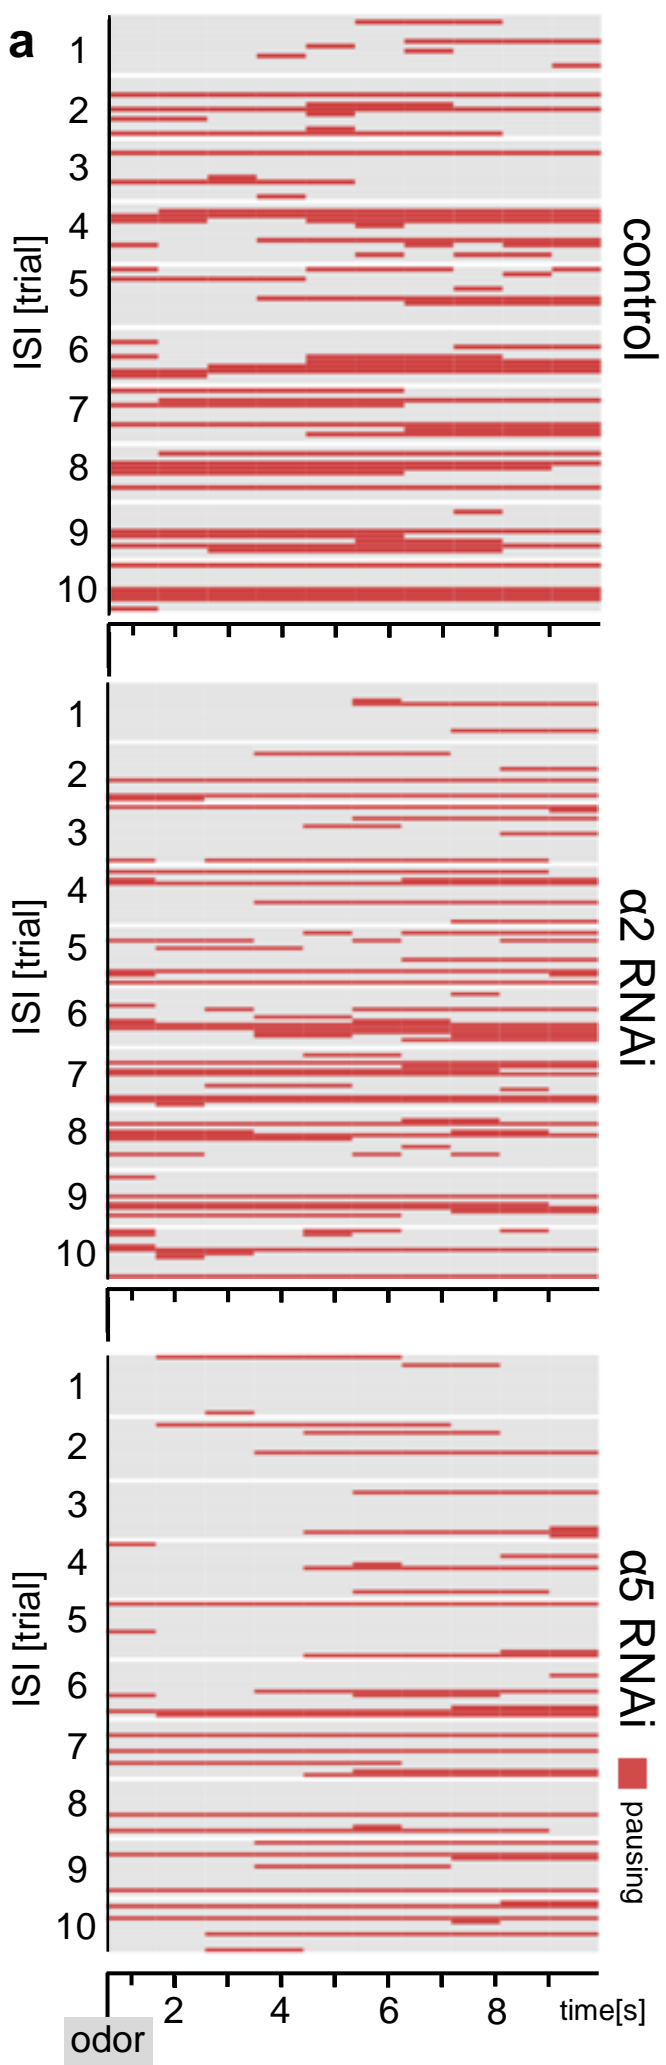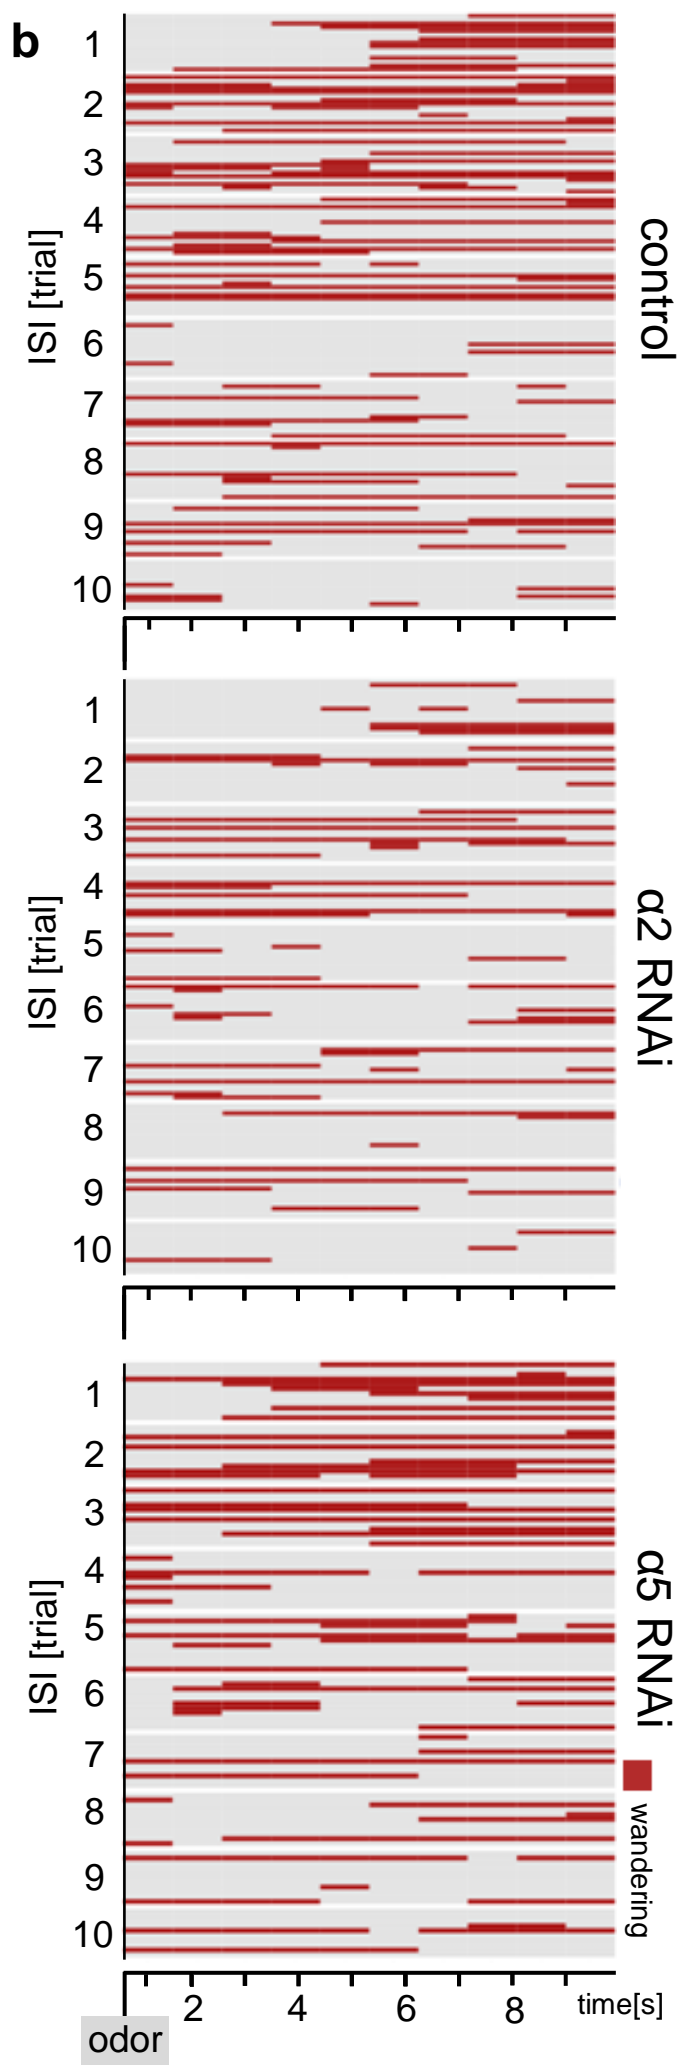

Supplement: supp [file elife-80445-supp-v1.zip]

**a**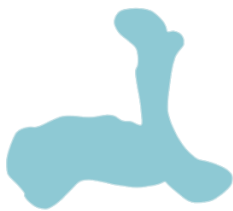

KCs

aversive conditioning

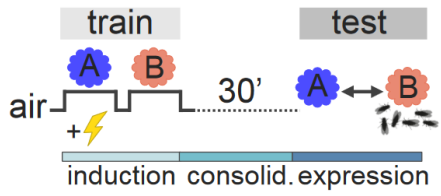**b**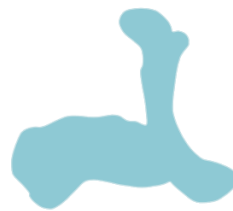

KCs

appetitive conditioning

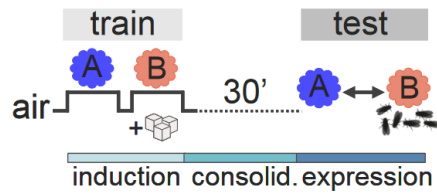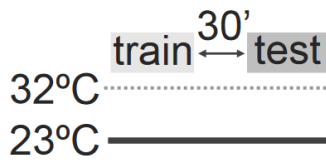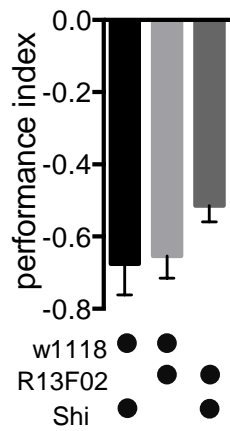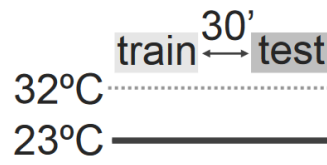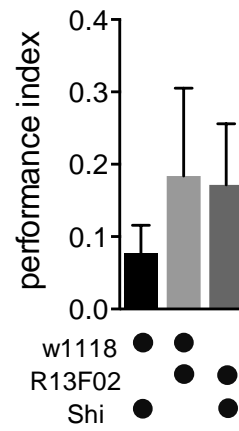

Supplement: supp [file elife-80445-supp-v1.zip]

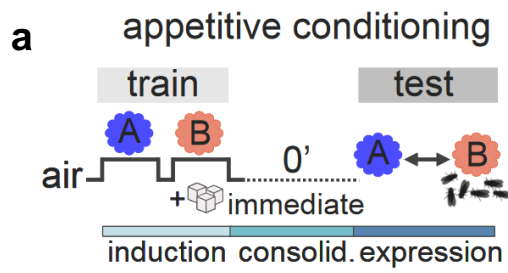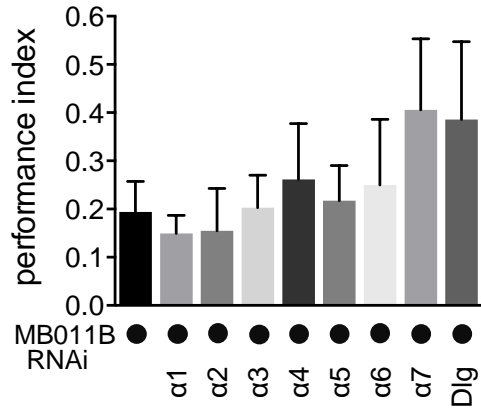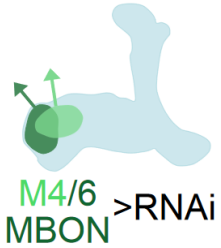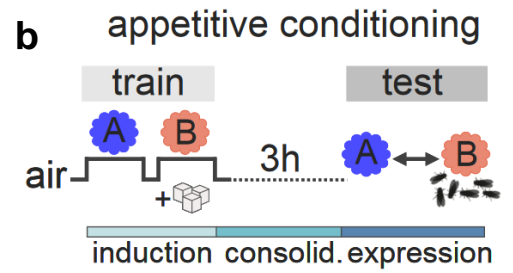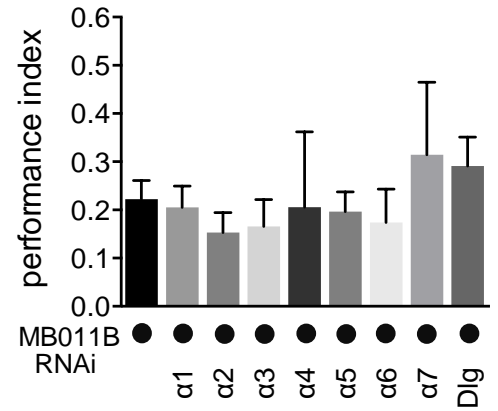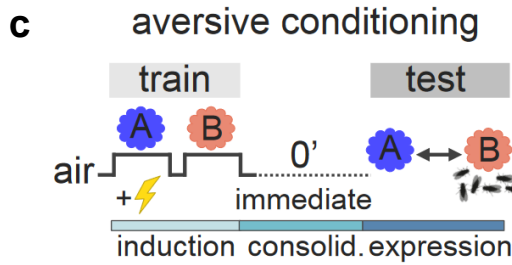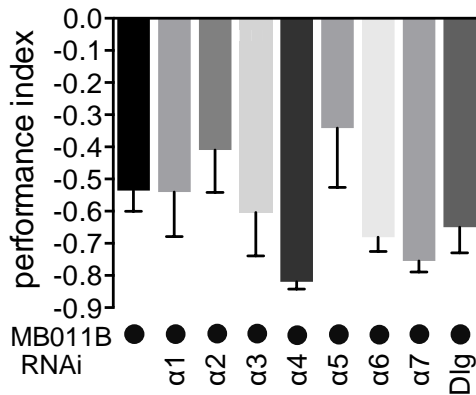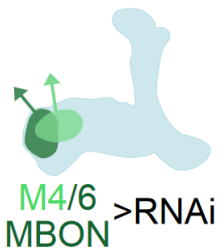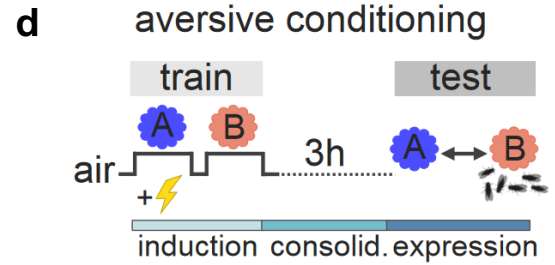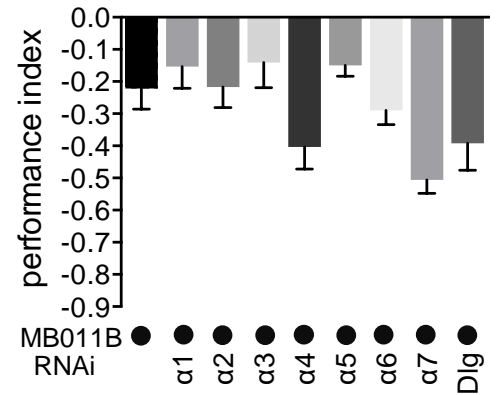

Supplement: supp [file elife-80445-supp-v1.zip]

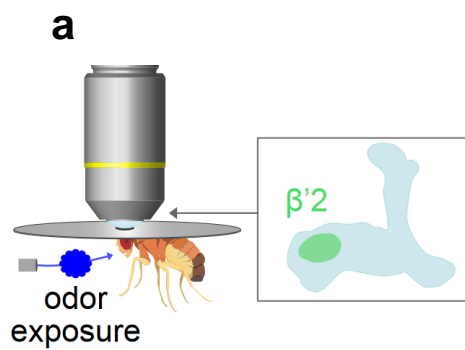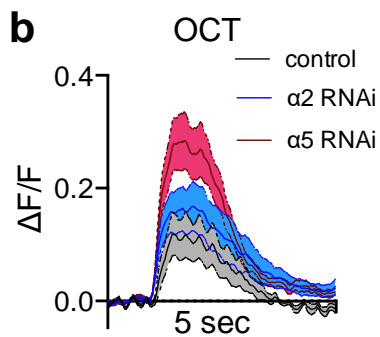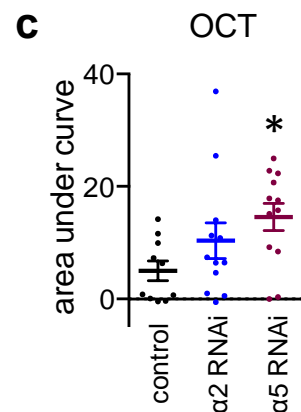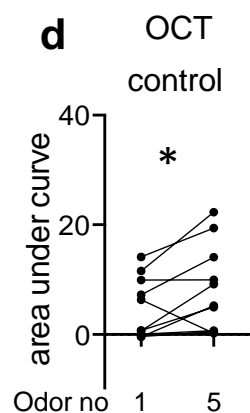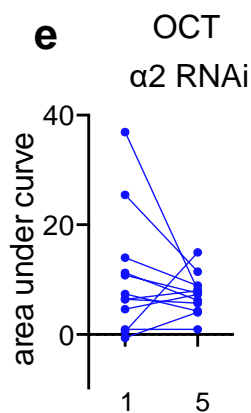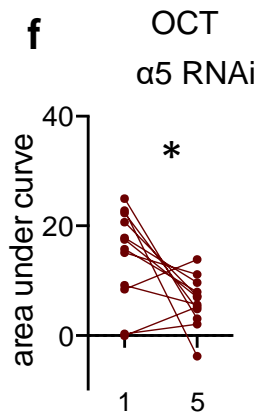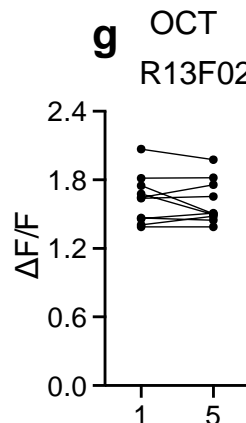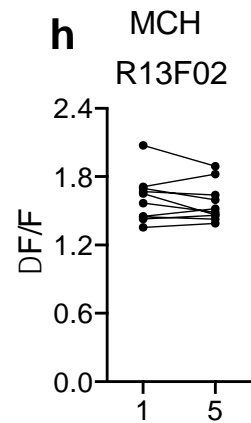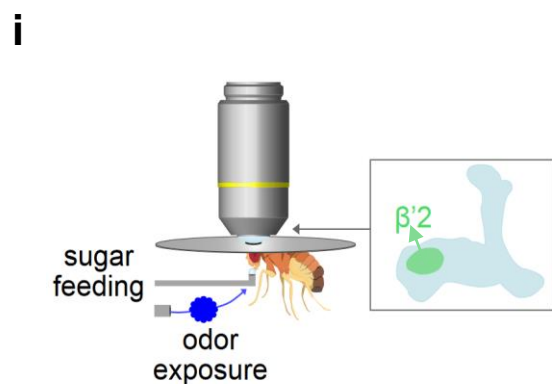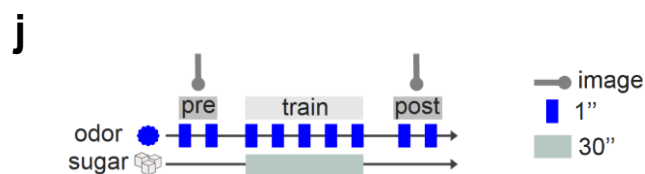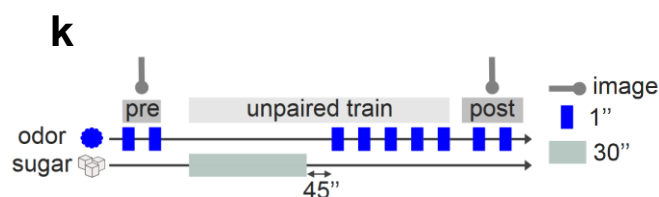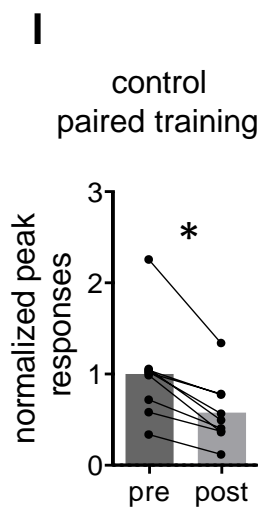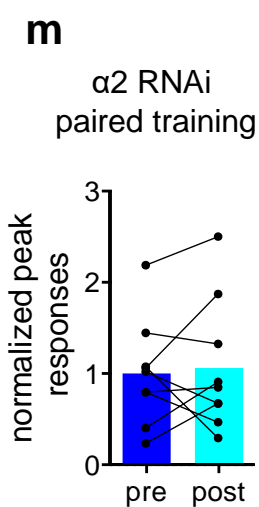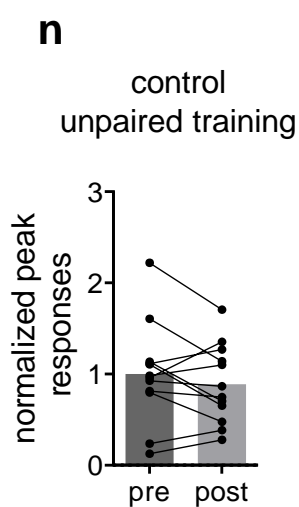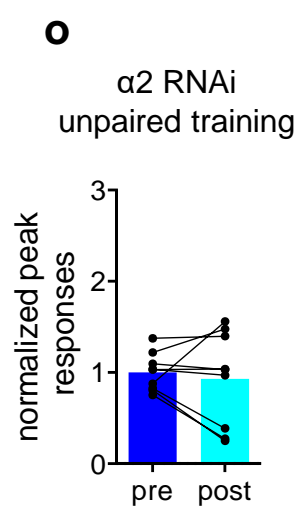

Supplement: supp [file elife-80445-supp-v1.zip]

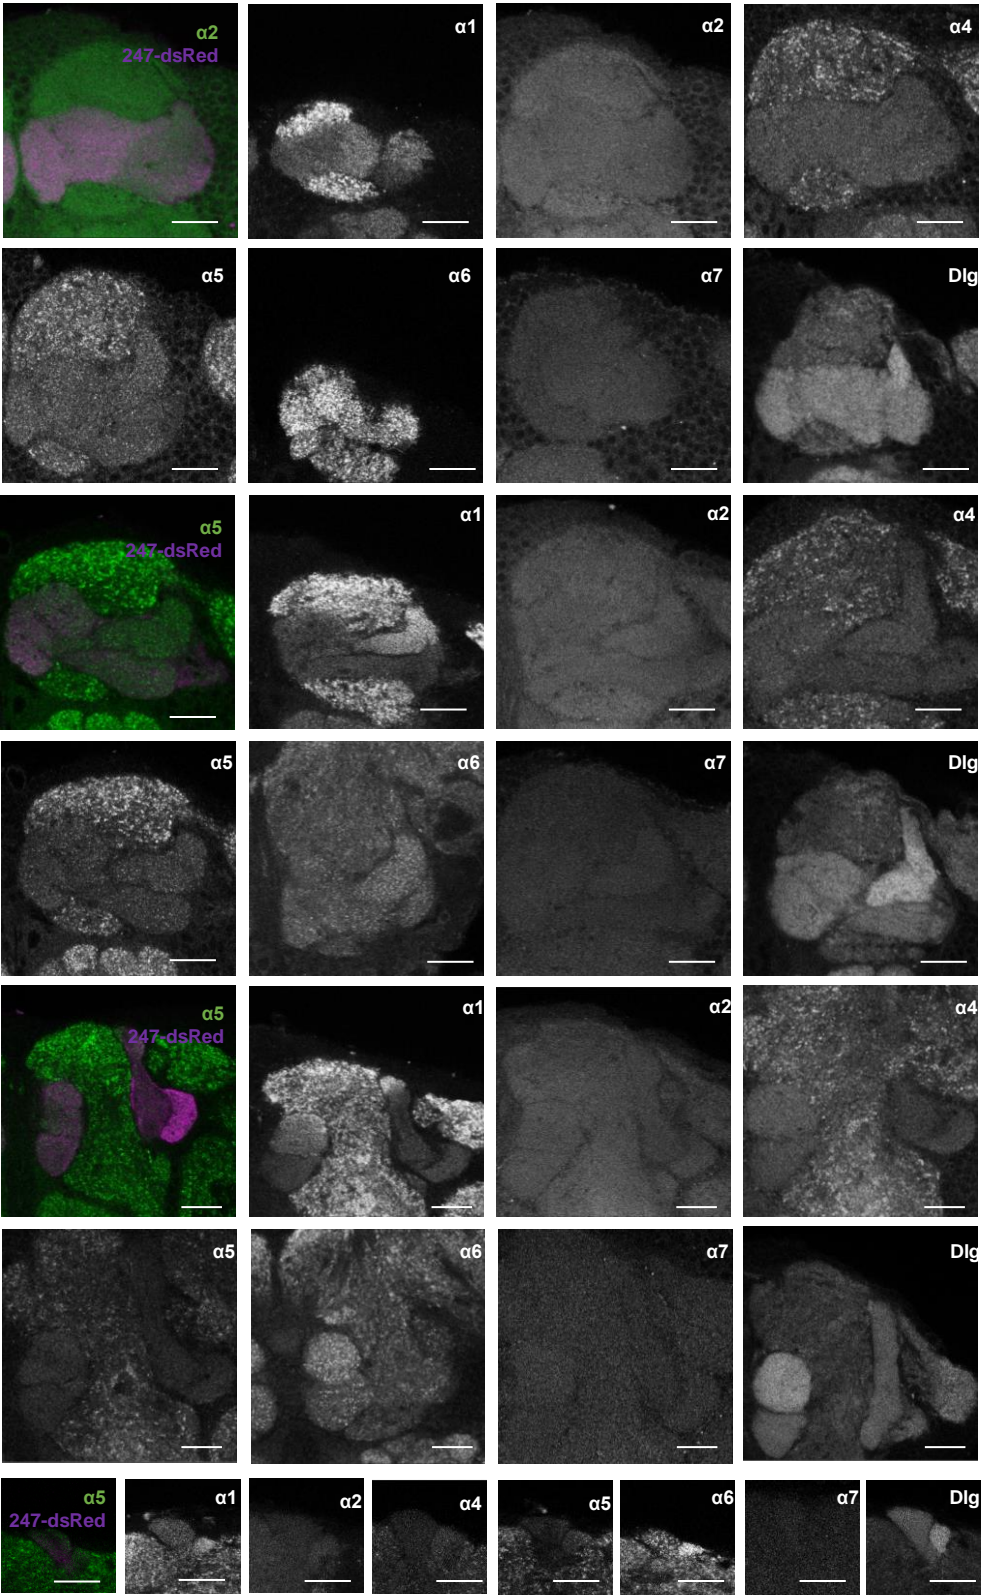

Supplement: supp [file elife-80445-supp-v1.zip]

**a**  $Dlg^{GFP}$

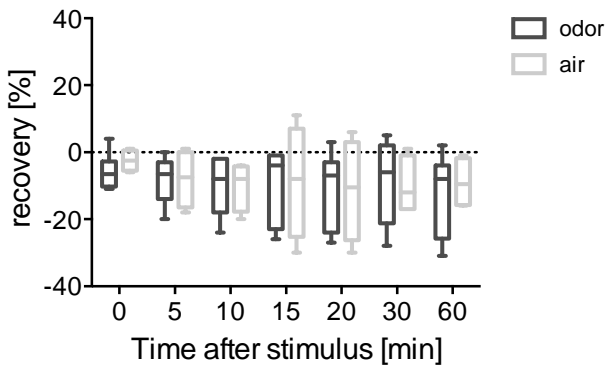

Supplement: supp [file elife-80445-supp-v1.zip]

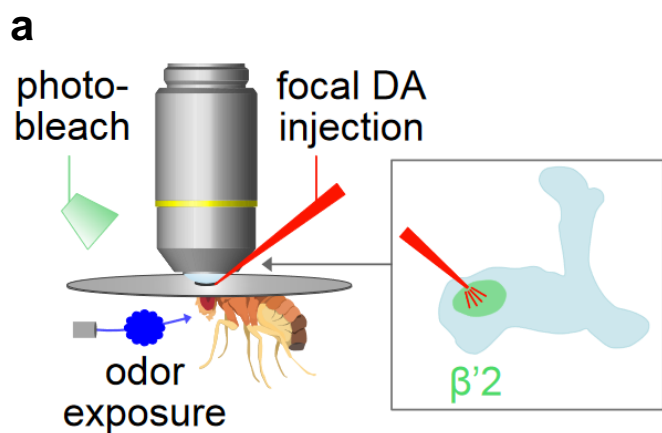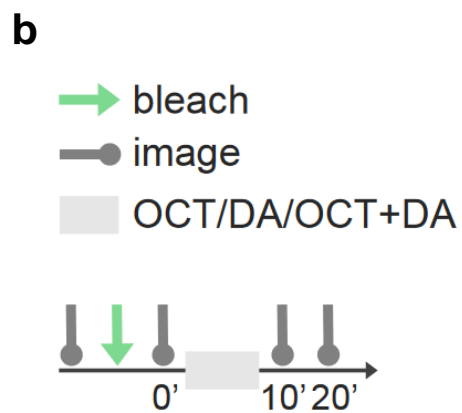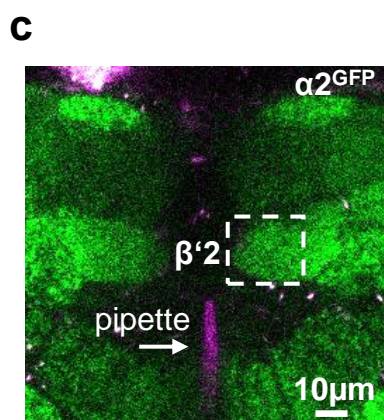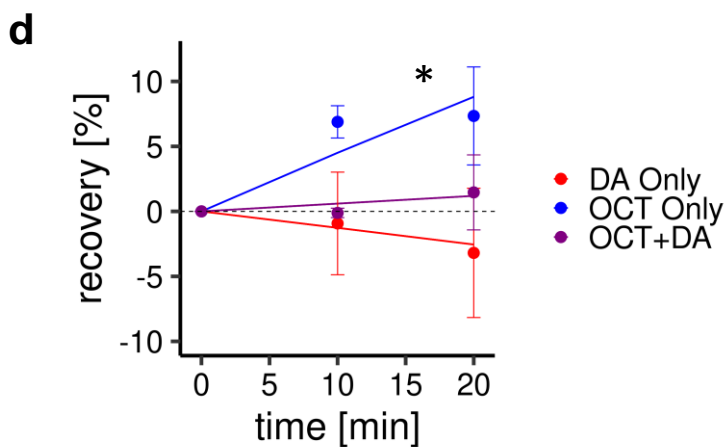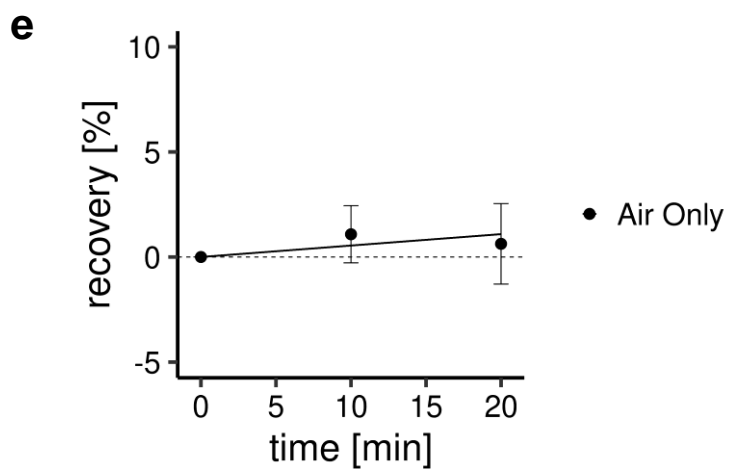

Supplement: supp [file elife-80445-supp-v1.zip]
